# Supplementary material
Source: Springer Nature journal article supplement (https://www.springermedizin.de/resource/supplementary/12872_2013_750_MOESM2_ESM.pdf/9430414)

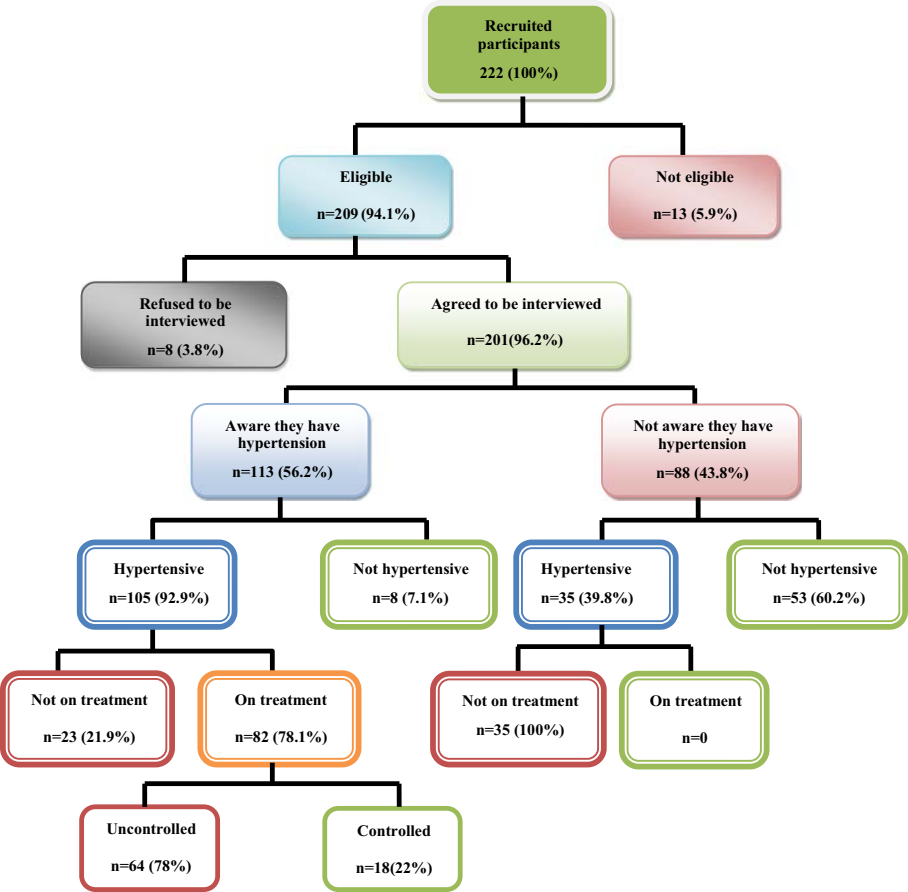

Supplement: MOESM2 [file 9430414]
